# Supplementary material for: Novel Gold Nanorods@Thiolated Pectin on the Killing of HeLa Cells by Photothermal Ablation
Source: MDPI journal article supplement (doi:10.3390/pharmaceutics15112571), 2023-11-02
Supplement: s1 [file s1]

## Supplementary-Information

# Novel Gold Nanorods@Thiolated Pectin on the Killing of HeLa Cells by Photothermal Ablation

Osvaldo Beltran <sup>1</sup>, Mariangel Luna <sup>1</sup>, Marisol Gastelum <sup>1</sup>, Alba Costa-Santos <sup>2,3</sup>,  
Adriana Cambón <sup>2,3</sup>, Pablo Taboada <sup>2,3</sup>, Marco A. López-Mata <sup>4</sup>, Antonio Topete <sup>5</sup>  
and Josue Juarez <sup>1,6,\*</sup>

### 1. DLS.

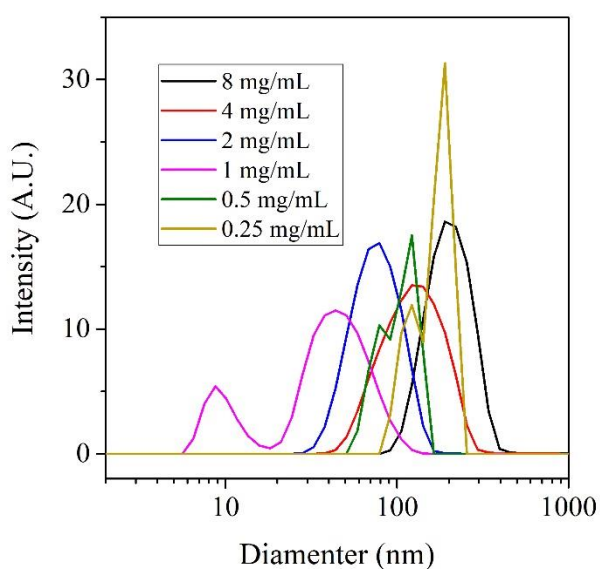

### 2. The setup for Zeta Potential Measurements

Sample: 0.25 mg/mL SH-PEC

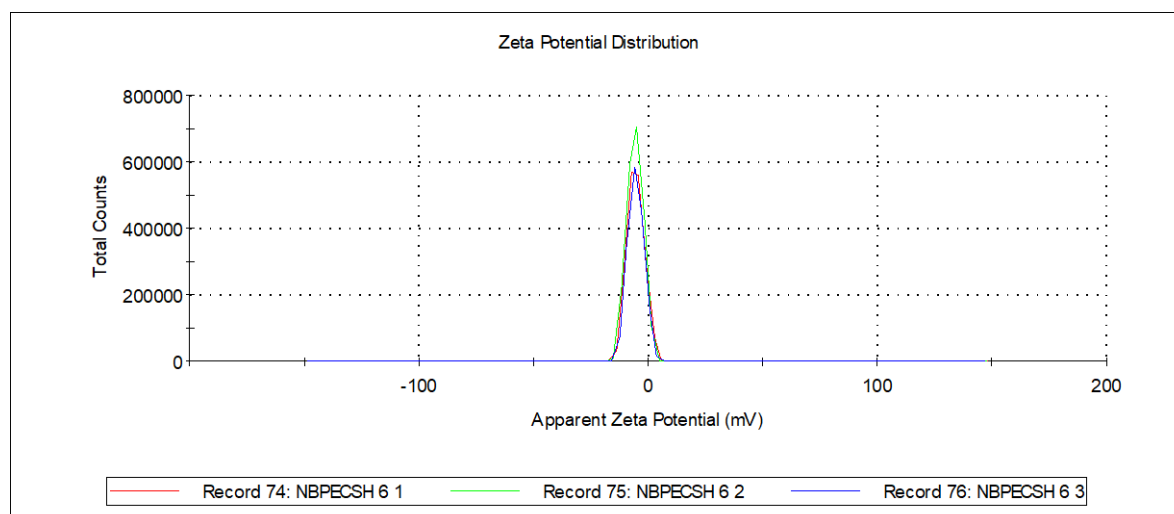

**Sample: 0.5 mg/mL SH-PEC**

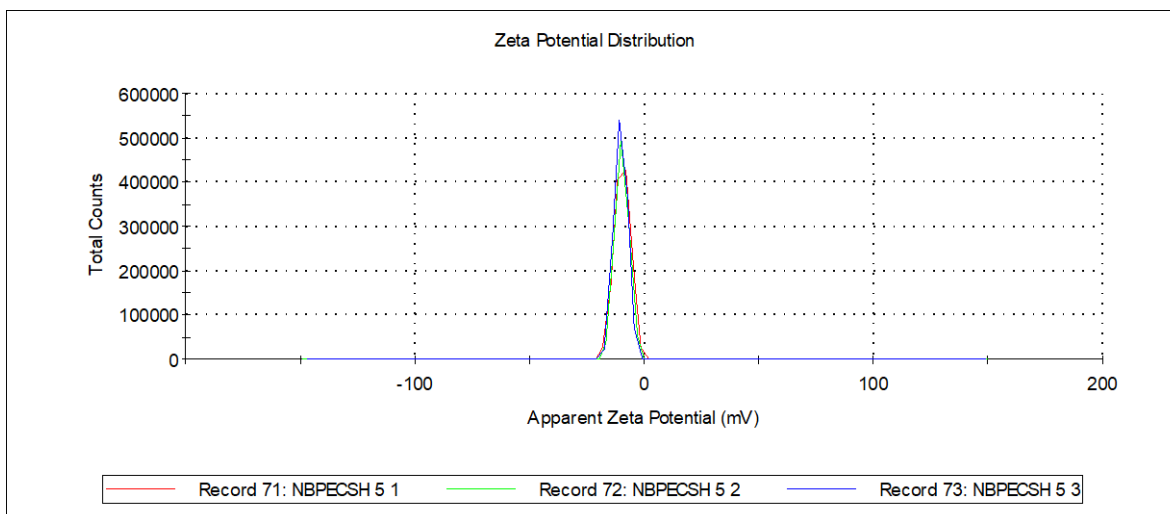

**Sample: 1.0 mg/mL SH-PEC**

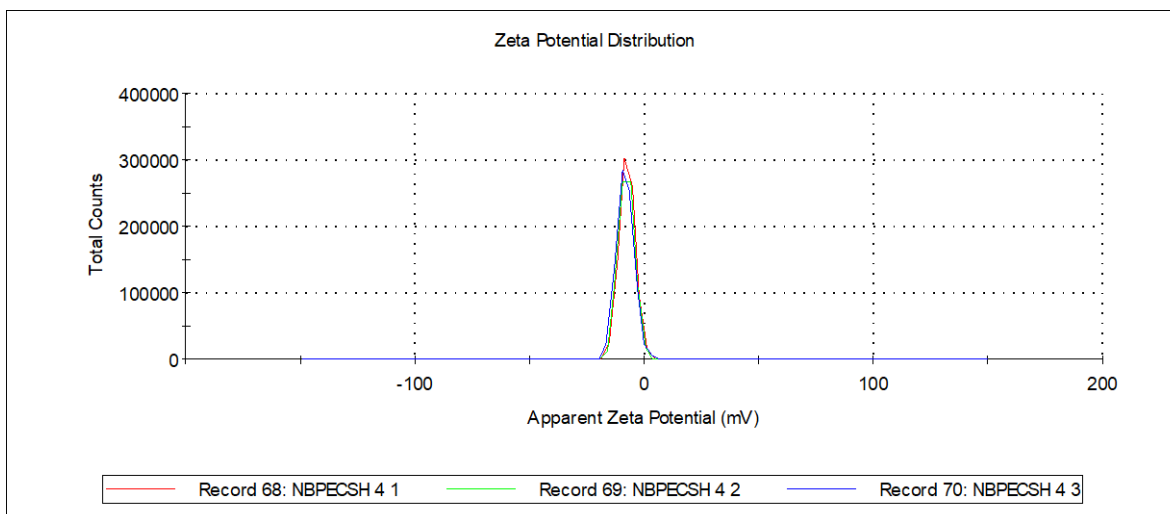

**Sample: 2.0 mg/mL SH-PEC**

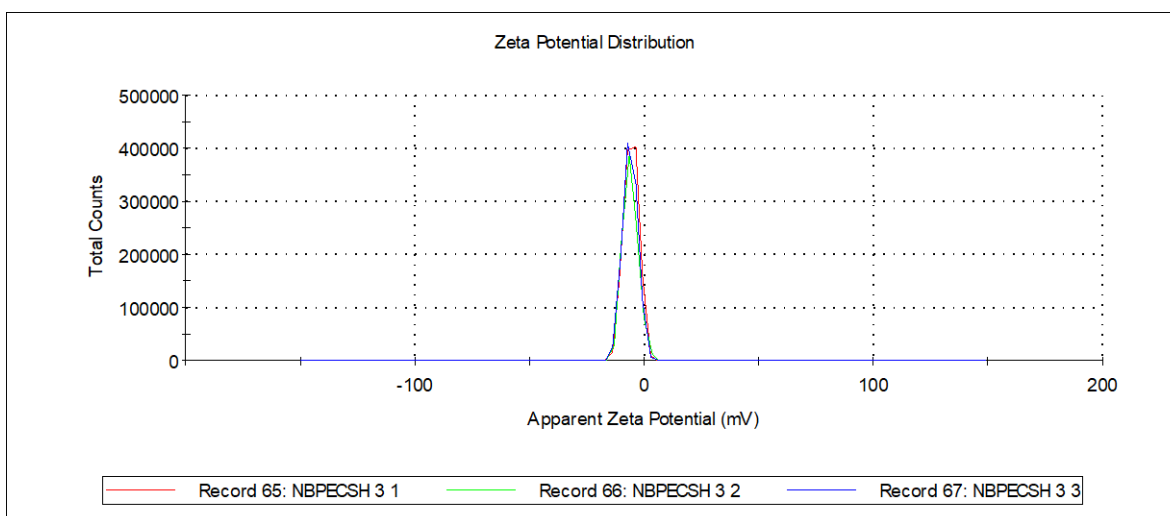

**Sample: 4.0 mg/mL SH-PEC**

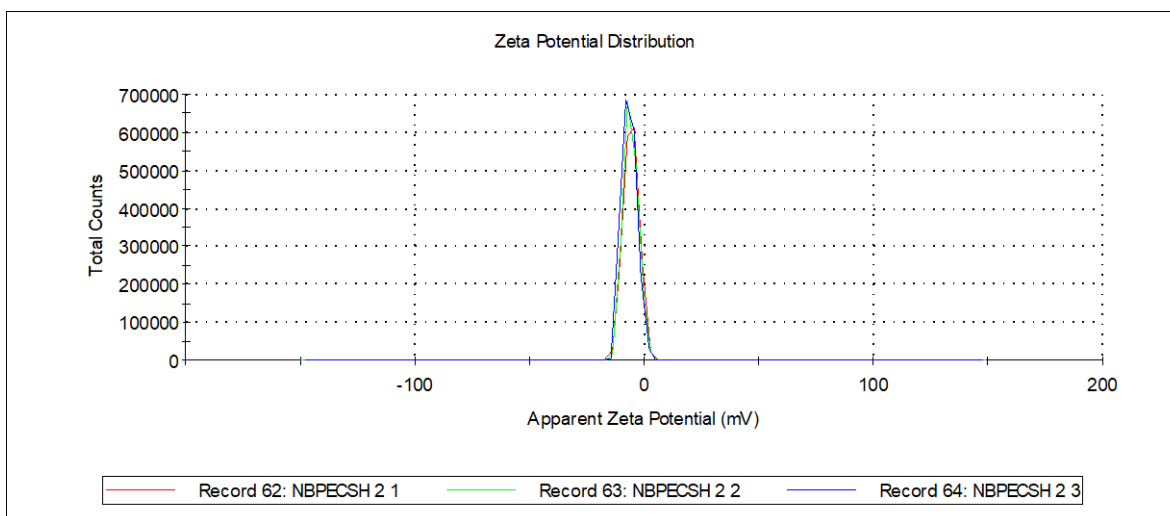

**Sample: 8.0 mg/mL SH-PEC**

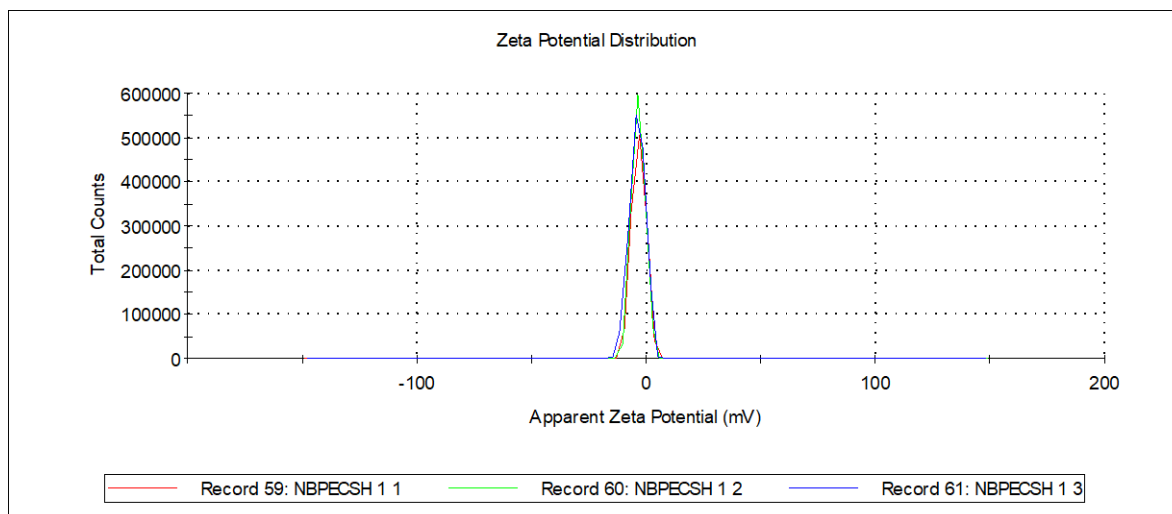

### 3.0 Photothermal assays

Temperature versus time recorded during the laser irradiation cycles (Figure 2 A, C, E, G, and I). These experimental data were adjusted to Roper equation ( $\eta = \frac{hS(T_{eq}-T_{surr})-Q_0}{P(1-10^{-A_{808}})}$ ) to determine the photothermal conversion efficiency ( $\eta$ ) of the AuNRs stabilized with different concentrations of SH-PEC.

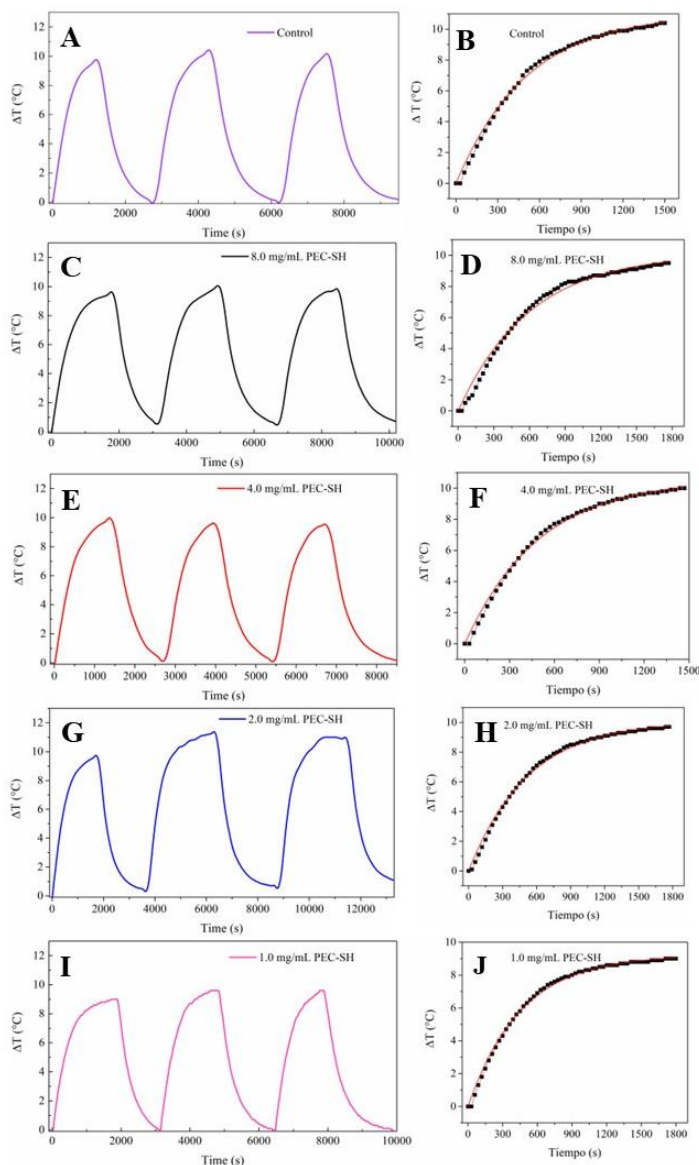

Roper, D. K., Ahn, W., & Hoepfner, M. (2007). *Microscale Heat Transfer Transduced by Surface Plasmon Resonant Gold Nanoparticles*. <https://doi.org/10.1021/jp064341w>

#### 4.0 Statistical data.

T-Test

Viability Without Irradiation

Effect on [AuNRs] in cell viability of Balb/c 3t3 cell line

|          |         |
|----------|---------|
| Column A | Control |
| vs       | vs      |
| Column B | 1 mg/mL |

|                                         |              |
|-----------------------------------------|--------------|
| Unpaired t test                         |              |
| P value                                 | 0.0036       |
| P value summary                         | **           |
| Are means signif. different? (P < 0.05) | Yes          |
| One- or two-tailed P value?             | Two-tailed   |
| t, df                                   | t=6.118 df=4 |

|          |         |
|----------|---------|
| Column A | Control |
| vs       | vs      |
| Column C | 2 mg/mL |

|                                         |              |
|-----------------------------------------|--------------|
| Unpaired t test                         |              |
| P value                                 | 0.0063       |
| P value summary                         | **           |
| Are means signif. different? (P < 0.05) | Yes          |
| One- or two-tailed P value?             | Two-tailed   |
| t, df                                   | t=5.244 df=4 |

|          |         |
|----------|---------|
| Column A | Control |
| vs       | vs      |
| Column D | 4 mg/mL |

|                                         |              |
|-----------------------------------------|--------------|
| Unpaired t test                         |              |
| P value                                 | 0.0225       |
| P value summary                         | *            |
| Are means signif. different? (P < 0.05) | Yes          |
| One- or two-tailed P value?             | Two-tailed   |
| t, df                                   | t=3.612 df=4 |

|          |         |
|----------|---------|
| Column A | Control |
| vs       | vs      |

|                                         |              |
|-----------------------------------------|--------------|
| Column E                                | 8 mg/mL      |
| Unpaired t test                         |              |
| P value                                 | 0.064        |
| P value summary                         | ns           |
| Are means signif. different? (P < 0.05) | No           |
| One- or two-tailed P value?             | Two-tailed   |
| t, df                                   | t=2.540 df=4 |

|                                         |              |
|-----------------------------------------|--------------|
| Column A                                | Control      |
| vs                                      | vs           |
| Column B                                | 1 mg/mL      |
| Unpaired t test                         |              |
| P value                                 | < 0.0001     |
| P value summary                         | ***          |
| Are means signif. different? (P < 0.05) | Yes          |
| One- or two-tailed P value?             | Two-tailed   |
| t, df                                   | t=26.88 df=4 |

|                                         |              |
|-----------------------------------------|--------------|
| Column A                                | Control      |
| vs                                      | vs           |
| Column C                                | 2 mg/mL      |
| Unpaired t test                         |              |
| P value                                 | 0.0021       |
| P value summary                         | **           |
| Are means signif. different? (P < 0.05) | Yes          |
| One- or two-tailed P value?             | Two-tailed   |
| t, df                                   | t=7.039 df=4 |

|                                         |              |
|-----------------------------------------|--------------|
| Column A                                | Control      |
| vs                                      | vs           |
| Column D                                | 4 mg/mL      |
| Unpaired t test                         |              |
| P value                                 | < 0.0001     |
| P value summary                         | ***          |
| Are means signif. different? (P < 0.05) | Yes          |
| One- or two-tailed P value?             | Two-tailed   |
| t, df                                   | t=20.00 df=4 |

|          |         |
|----------|---------|
| Column A | Control |
| vs       | vs      |
| Column E | 8 mg/mL |

|                                             |              |
|---------------------------------------------|--------------|
| Unpaired t test                             |              |
| P value                                     | 0.0006       |
| P value summary                             | ***          |
| Are means signif. different? ( $P < 0.05$ ) | Yes          |
| One- or two-tailed P value?                 | Two-tailed   |
| t, df                                       | t=9.815 df=4 |

|          |         |
|----------|---------|
| Column A | Control |
| vs       | vs      |
| Column B | 1 mg/mL |

|                                             |              |
|---------------------------------------------|--------------|
| Unpaired t test                             |              |
| P value                                     | < 0.0001     |
| P value summary                             | ***          |
| Are means signif. different? ( $P < 0.05$ ) | Yes          |
| One- or two-tailed P value?                 | Two-tailed   |
| t, df                                       | t=28.91 df=4 |

|          |         |
|----------|---------|
| Column A | Control |
| vs       | vs      |
| Column C | 2 mg/mL |

|                                             |              |
|---------------------------------------------|--------------|
| Unpaired t test                             |              |
| P value                                     | < 0.0001     |
| P value summary                             | ***          |
| Are means signif. different? ( $P < 0.05$ ) | Yes          |
| One- or two-tailed P value?                 | Two-tailed   |
| t, df                                       | t=30.78 df=4 |

|          |         |
|----------|---------|
| Column A | Control |
| vs       | vs      |
| Column D | 4 mg/mL |

|                 |        |
|-----------------|--------|
| Unpaired t test |        |
| P value         | 0.0002 |
| P value summary | ***    |



|                                             |              |
|---------------------------------------------|--------------|
| Are means signif. different? ( $P < 0.05$ ) | Yes          |
| One- or two-tailed P value?                 | Two-tailed   |
| t, df                                       | t=13.20 df=4 |

|          |         |
|----------|---------|
| Column A | Control |
| vs       | vs      |
| Column E | 8 mg/mL |

|                                             |              |
|---------------------------------------------|--------------|
| Unpaired t test                             |              |
| P value                                     | 0.0011       |
| P value summary                             | **           |
| Are means signif. different? ( $P < 0.05$ ) | Yes          |
| One- or two-tailed P value?                 | Two-tailed   |
| t, df                                       | t=8.378 df=4 |

|          |         |
|----------|---------|
| Column A | Control |
| vs       | vs      |
| Column B | 1 mg/mL |

|                                             |              |
|---------------------------------------------|--------------|
| Unpaired t test                             |              |
| P value                                     | < 0.0001     |
| P value summary                             | ***          |
| Are means signif. different? ( $P < 0.05$ ) | Yes          |
| One- or two-tailed P value?                 | Two-tailed   |
| t, df                                       | t=15.79 df=4 |

|          |         |
|----------|---------|
| Column A | Control |
| vs       | vs      |
| Column C | 2 mg/mL |

|                                             |              |
|---------------------------------------------|--------------|
| Unpaired t test                             |              |
| P value                                     | < 0.0001     |
| P value summary                             | ***          |
| Are means signif. different? ( $P < 0.05$ ) | Yes          |
| One- or two-tailed P value?                 | Two-tailed   |
| t, df                                       | t=19.93 df=4 |

|          |         |
|----------|---------|
| Column A | Control |
| vs       | vs      |
| Column D | 4 mg/mL |

|                                         |              |
|-----------------------------------------|--------------|
| Unpaired t test                         |              |
| P value                                 | < 0.0001     |
| P value summary                         | ***          |
| Are means signif. different? (P < 0.05) | Yes          |
| One- or two-tailed P value?             | Two-tailed   |
| t, df                                   | t=41.37 df=4 |

|          |         |
|----------|---------|
| Column A | Control |
| vs       | vs      |
| Column E | 8 mg/mL |

|                                         |              |
|-----------------------------------------|--------------|
| Unpaired t test                         |              |
| P value                                 | < 0.0001     |
| P value summary                         | ***          |
| Are means signif. different? (P < 0.05) | Yes          |
| One- or two-tailed P value?             | Two-tailed   |
| t, df                                   | t=16.21 df=4 |

|          |         |
|----------|---------|
| Column A | Control |
| vs       | vs      |
| Column B | 1 mg/mL |

|                                         |              |
|-----------------------------------------|--------------|
| Unpaired t test                         |              |
| P value                                 | 0.0003       |
| P value summary                         | ***          |
| Are means signif. different? (P < 0.05) | Yes          |
| One- or two-tailed P value?             | Two-tailed   |
| t, df                                   | t=12.21 df=4 |

|          |         |
|----------|---------|
| Column A | Control |
| vs       | vs      |
| Column C | 2 mg/mL |

|                                         |              |
|-----------------------------------------|--------------|
| Unpaired t test                         |              |
| P value                                 | 0.0003       |
| P value summary                         | ***          |
| Are means signif. different? (P < 0.05) | Yes          |
| One- or two-tailed P value?             | Two-tailed   |
| t, df                                   | t=11.50 df=4 |

|          |         |
|----------|---------|
| Column A | Control |
|----------|---------|

|                                         |              |
|-----------------------------------------|--------------|
| vs                                      | vs           |
| Column D                                | 4 mg/mL      |
| Unpaired t test                         |              |
| P value                                 | 0.0001       |
| P value summary                         | ***          |
| Are means signif. different? (P < 0.05) | Yes          |
| One- or two-tailed P value?             | Two-tailed   |
| t, df                                   | t=15.18 df=4 |

|                                         |              |
|-----------------------------------------|--------------|
| Column A                                | Control      |
| vs                                      | vs           |
| Column E                                | 8 mg/mL      |
| Unpaired t test                         |              |
| P value                                 | 0.0003       |
| P value summary                         | ***          |
| Are means signif. different? (P < 0.05) | Yes          |
| One- or two-tailed P value?             | Two-tailed   |
| t, df                                   | t=11.85 df=4 |

## T-Test

### Viability Without Irradiation

Effect on [AuNRs] in cell viability of HeLa cell line

|                                         |              |
|-----------------------------------------|--------------|
| Column A                                | Control      |
| vs                                      | vs           |
| Column B                                | 1 mg/mL      |
| Unpaired t test                         |              |
| P value                                 | 0.0024       |
| P value summary                         | **           |
| Are means signif. different? (P < 0.05) | Yes          |
| One- or two-tailed P value?             | Two-tailed   |
| t, df                                   | t=6.828 df=4 |
| Table Analyzed                          | 6250000000   |
| Column A                                | Control      |
| vs                                      | vs           |
| Column C                                | 2 mg/mL      |

Unpaired t test

|                                         |              |
|-----------------------------------------|--------------|
| P value                                 | < 0.0001     |
| P value summary                         | ***          |
| Are means signif. different? (P < 0.05) | Yes          |
| One- or two-tailed P value?             | Two-tailed   |
| t, df                                   | t=20.99 df=4 |
| Table Analyzed                          | 6250000000   |
| Column A                                | Control      |
| vs                                      | vs           |
| Column D                                | 4 mg/mL      |

|                                         |              |
|-----------------------------------------|--------------|
| Unpaired t test                         |              |
| P value                                 | 0.0006       |
| P value summary                         | ***          |
| Are means signif. different? (P < 0.05) | Yes          |
| One- or two-tailed P value?             | Two-tailed   |
| t, df                                   | t=9.764 df=4 |
| Table Analyzed                          | 6250000000   |
| Column A                                | Control      |
| vs                                      | vs           |
| Column E                                | 8 mg/mL      |

|                                         |              |
|-----------------------------------------|--------------|
| Unpaired t test                         |              |
| P value                                 | 0.0019       |
| P value summary                         | **           |
| Are means signif. different? (P < 0.05) | Yes          |
| One- or two-tailed P value?             | Two-tailed   |
| t, df                                   | t=7.244 df=4 |
| Table Analyzed                          | 12500000000  |
| Column A                                | Control      |
| vs                                      | vs           |
| Column B                                | 1 mg/mL      |

|                                         |              |
|-----------------------------------------|--------------|
| Unpaired t test                         |              |
| P value                                 | 0.0011       |
| P value summary                         | **           |
| Are means signif. different? (P < 0.05) | Yes          |
| One- or two-tailed P value?             | Two-tailed   |
| t, df                                   | t=8.428 df=4 |
| Table Analyzed                          | 12500000000  |
| Column A                                | Control      |
| vs                                      | vs           |
| Column C                                | 2 mg/mL      |

|                                         |              |
|-----------------------------------------|--------------|
| Unpaired t test                         |              |
| P value                                 | 0.0006       |
| P value summary                         | ***          |
| Are means signif. different? (P < 0.05) | Yes          |
| One- or two-tailed P value?             | Two-tailed   |
| t, df                                   | t=9.855 df=4 |
| Table Analyzed                          | 12500000000  |
| Column A                                | Control      |
| vs                                      | vs           |
| Column D                                | 4 mg/mL      |

|                                         |              |
|-----------------------------------------|--------------|
| Unpaired t test                         |              |
| P value                                 | 0.0002       |
| P value summary                         | ***          |
| Are means signif. different? (P < 0.05) | Yes          |
| One- or two-tailed P value?             | Two-tailed   |
| t, df                                   | t=12.85 df=4 |
| Table Analyzed                          | 12500000000  |
| Column A                                | Control      |
| vs                                      | vs           |
| Column E                                | 8 mg/mL      |

|                                         |              |
|-----------------------------------------|--------------|
| Unpaired t test                         |              |
| P value                                 | 0.0002       |
| P value summary                         | ***          |
| Are means signif. different? (P < 0.05) | Yes          |
| One- or two-tailed P value?             | Two-tailed   |
| t, df                                   | t=13.19 df=4 |
| Table Analyzed                          | 25000000000  |
| Column A                                | Control      |
| vs                                      | vs           |
| Column B                                | 1 mg/mL      |

|                                         |              |
|-----------------------------------------|--------------|
| Unpaired t test                         |              |
| P value                                 | 0.0108       |
| P value summary                         | *            |
| Are means signif. different? (P < 0.05) | Yes          |
| One- or two-tailed P value?             | Two-tailed   |
| t, df                                   | t=4.499 df=4 |
| Table Analyzed                          | 25000000000  |
| Column A                                | Control      |
| vs                                      | vs           |
| Column C                                | 2 mg/mL      |

|                                         |              |
|-----------------------------------------|--------------|
| Unpaired t test                         |              |
| P value                                 | 0.0029       |
| P value summary                         | **           |
| Are means signif. different? (P < 0.05) | Yes          |
| One- or two-tailed P value?             | Two-tailed   |
| t, df                                   | t=6.477 df=4 |
| Table Analyzed                          | 25000000000  |
| Column A                                | Control      |
| vs                                      | vs           |
| Column D                                | 4 mg/mL      |

|                                         |              |
|-----------------------------------------|--------------|
| Unpaired t test                         |              |
| P value                                 | 0.0002       |
| P value summary                         | ***          |
| Are means signif. different? (P < 0.05) | Yes          |
| One- or two-tailed P value?             | Two-tailed   |
| t, df                                   | t=13.53 df=4 |
| Table Analyzed                          | 25000000000  |
| Column A                                | Control      |
| vs                                      | vs           |
| Column E                                | 8 mg/mL      |

|                                         |              |
|-----------------------------------------|--------------|
| Unpaired t test                         |              |
| P value                                 | 0.0021       |
| P value summary                         | **           |
| Are means signif. different? (P < 0.05) | Yes          |
| One- or two-tailed P value?             | Two-tailed   |
| t, df                                   | t=7.052 df=4 |
| Table Analyzed                          | 50000000000  |
| Column A                                | Control      |
| vs                                      | vs           |
| Column B                                | 1 mg/mL      |

|                                         |              |
|-----------------------------------------|--------------|
| Unpaired t test                         |              |
| P value                                 | 0.001        |
| P value summary                         | ***          |
| Are means signif. different? (P < 0.05) | Yes          |
| One- or two-tailed P value?             | Two-tailed   |
| t, df                                   | t=8.674 df=4 |
| Table Analyzed                          | 50000000000  |
| Column A                                | Control      |
| vs                                      | vs           |

|                                         |              |
|-----------------------------------------|--------------|
| Column C                                | 2 mg/mL      |
|                                         |              |
| Unpaired t test                         |              |
| P value                                 | 0.0004       |
| P value summary                         | ***          |
| Are means signif. different? (P < 0.05) | Yes          |
| One- or two-tailed P value?             | Two-tailed   |
| t, df                                   | t=10.66 df=4 |
| Table Analyzed                          | 50000000000  |
| Column A                                | Control      |
| vs                                      | vs           |
| Column D                                | 4 mg/mL      |

|                                         |              |
|-----------------------------------------|--------------|
| Unpaired t test                         |              |
| P value                                 | 0.0011       |
| P value summary                         | **           |
| Are means signif. different? (P < 0.05) | Yes          |
| One- or two-tailed P value?             | Two-tailed   |
| t, df                                   | t=8.383 df=4 |
| Table Analyzed                          | 50000000000  |
| Column A                                | Control      |
| vs                                      | vs           |
| Column E                                | 8 mg/mL      |

|                                         |              |
|-----------------------------------------|--------------|
| Unpaired t test                         |              |
| P value                                 | 0.0113       |
| P value summary                         | *            |
| Are means signif. different? (P < 0.05) | Yes          |
| One- or two-tailed P value?             | Two-tailed   |
| t, df                                   | t=4.448 df=4 |
| Table Analyzed                          | 1E+11        |
| Column A                                | Control      |
| vs                                      | vs           |
| Column B                                | 1 mg/mL      |

|                                         |              |
|-----------------------------------------|--------------|
| Unpaired t test                         |              |
| P value                                 | < 0.0001     |
| P value summary                         | ***          |
| Are means signif. different? (P < 0.05) | Yes          |
| One- or two-tailed P value?             | Two-tailed   |
| t, df                                   | t=37.10 df=4 |
| Table Analyzed                          | 1E+11        |
| Column A                                | Control      |

|                                         |              |
|-----------------------------------------|--------------|
| vs                                      | vs           |
| Column C                                | 2 mg/mL      |
| Unpaired t test                         |              |
| P value                                 | 0.0005       |
| P value summary                         | ***          |
| Are means signif. different? (P < 0.05) | Yes          |
| One- or two-tailed P value?             | Two-tailed   |
| t, df                                   | t=10.48 df=4 |
| Table Analyzed                          | 1E+11        |
| Column A                                | Control      |
| vs                                      | vs           |
| Column D                                | 4 mg/mL      |
| Unpaired t test                         |              |
| P value                                 | 0.0002       |
| P value summary                         | ***          |
| Are means signif. different? (P < 0.05) | Yes          |
| One- or two-tailed P value?             | Two-tailed   |
| t, df                                   | t=12.67 df=4 |
| Table Analyzed                          | 1E+11        |
| Column A                                | Control      |
| vs                                      | vs           |
| Column E                                | 8 mg/mL      |
| Unpaired t test                         |              |
| P value                                 | 0.0116       |
| P value summary                         | *            |
| Are means signif. different? (P < 0.05) | Yes          |
| One- or two-tailed P value?             | Two-tailed   |
| t, df                                   | t=4.409 df=4 |

## T-Test

### Viability With Irradiation

Effect on [AuNRs] in cell viability of Balb/c 3T3

|                |         |
|----------------|---------|
| Table Analyzed | Balb    |
| Column A       | Control |
| vs             | vs      |
| Column B       | 1 mg/mL |



|                                         |            |
|-----------------------------------------|------------|
| Unpaired t test                         |            |
| P value                                 | 0.0017     |
| P value summary                         | **         |
| Are means signif. different? (P < 0.05) | Yes        |
| One- or two-tailed P value?             | Two-tailed |
| t, df                                   | t=7.5 df=4 |
| Table Analyzed                          | Balb       |
| Column A                                | Control    |
| vs                                      | vs         |
| Column C                                | 2 mg/mL    |

|                                         |              |
|-----------------------------------------|--------------|
| Unpaired t test                         |              |
| P value                                 | 0.0014       |
| P value summary                         | **           |
| Are means signif. different? (P < 0.05) | Yes          |
| One- or two-tailed P value?             | Two-tailed   |
| t, df                                   | t=7.939 df=4 |
| Table Analyzed                          | Balb         |
| Column A                                | Control      |
| vs                                      | vs           |
| Column D                                | 4 mg/mL      |

|                                         |              |
|-----------------------------------------|--------------|
| Unpaired t test                         |              |
| P value                                 | 0.0016       |
| P value summary                         | **           |
| Are means signif. different? (P < 0.05) | Yes          |
| One- or two-tailed P value?             | Two-tailed   |
| t, df                                   | t=7.569 df=4 |
| Table Analyzed                          | Balb         |
| Column A                                | Control      |
| vs                                      | vs           |
| Column E                                | 8 mg/mL      |

|                                         |              |
|-----------------------------------------|--------------|
| Unpaired t test                         |              |
| P value                                 | 0.0023       |
| P value summary                         | **           |
| Are means signif. different? (P < 0.05) | Yes          |
| One- or two-tailed P value?             | Two-tailed   |
| t, df                                   | t=6.916 df=4 |

T-Test

Viability With Irradiation

# Effect on [AuNRs] in cell viability of HeLa

|                                         |              |
|-----------------------------------------|--------------|
| Table Analyzed                          | HeLa         |
| Column A                                | Control      |
| vs                                      | vs           |
| Column B                                | 1 mg/mL      |
| Unpaired t test                         |              |
| P value                                 | < 0.0001     |
| P value summary                         | ***          |
| Are means signif. different? (P < 0.05) | Yes          |
| One- or two-tailed P value?             | Two-tailed   |
| t, df                                   | t=17 df=4    |
| Table Analyzed                          | HeLa         |
| Column A                                | Control      |
| vs                                      | vs           |
| Column C                                | 2 mg/mL      |
| Unpaired t test                         |              |
| P value                                 | < 0.0001     |
| P value summary                         | ***          |
| Are means signif. different? (P < 0.05) | Yes          |
| One- or two-tailed P value?             | Two-tailed   |
| t, df                                   | t=16.96 df=4 |
| Table Analyzed                          | HeLa         |
| Column A                                | Control      |
| vs                                      | vs           |
| Column D                                | 4 mg/mL      |
| Unpaired t test                         |              |
| P value                                 | 0.0002       |
| P value summary                         | ***          |
| Are means signif. different? (P < 0.05) | Yes          |
| One- or two-tailed P value?             | Two-tailed   |
| t, df                                   | t=13.60 df=4 |
| Table Analyzed                          | HeLa         |
| Column A                                | Control      |
| vs                                      | vs           |
| Column E                                | 8 mg/mL      |
| Unpaired t test                         |              |
| P value                                 | 0.0007       |
| P value summary                         | ***          |

|                                             |              |
|---------------------------------------------|--------------|
| Are means signif. different? ( $P < 0.05$ ) | Yes          |
| One- or two-tailed P value?                 | Two-tailed   |
| t, df                                       | t=9.409 df=4 |
| T-Test                                      |              |

## ROS Generation

Effect on [SH-PEC] in ROS Generation after irradiation in Balb/c 3T3 Cell line

|                |             |
|----------------|-------------|
| Table Analyzed | Balb        |
| Column B       | Control (-) |
| vs             | vs          |
| Column C       | 1 mg/mL     |

### Unpaired t test

|                                             |            |
|---------------------------------------------|------------|
| P value                                     | 0.0168     |
| P value summary                             | *          |
| Are means signif. different? ( $P < 0.05$ ) | Yes        |
| One- or two-tailed P value?                 | Two-tailed |
| t, df                                       | t=3.9 df=4 |

|                |             |
|----------------|-------------|
| Table Analyzed | Balb        |
| Column B       | Control (-) |
| vs             | vs          |
| Column D       | 2 mg/mL     |

### Unpaired t test

|                                             |            |
|---------------------------------------------|------------|
| P value                                     | 0.0584     |
| P value summary                             | ns         |
| Are means signif. different? ( $P < 0.05$ ) | No         |
| One- or two-tailed P value?                 | Two-tailed |
| t, df                                       | t=2.6 df=4 |

|                |             |
|----------------|-------------|
| Table Analyzed | Balb        |
| Column B       | Control (-) |
| vs             | vs          |
| Column E       | 4 mg/mL     |

### Unpaired t test

|                                             |            |
|---------------------------------------------|------------|
| P value                                     | 0.0024     |
| P value summary                             | **         |
| Are means signif. different? ( $P < 0.05$ ) | Yes        |
| One- or two-tailed P value?                 | Two-tailed |
| t, df                                       | t=6.8 df=4 |

|                |             |
|----------------|-------------|
| Table Analyzed | Balb        |
| Column B       | Control (-) |

|                                         |            |
|-----------------------------------------|------------|
| vs                                      | vs         |
| Column F                                | 8 mg/mL    |
| Unpaired t test                         |            |
| P value                                 | 0.0008     |
| P value summary                         | ***        |
| Are means signif. different? (P < 0.05) | Yes        |
| One- or two-tailed P value?             | Two-tailed |
| t, df                                   | t=9.0 df=4 |

## T-Test

### ROS Generation

Effect on [SH-PEC] in ROS Generation after irradiation in HeLa cell line

|                                         |             |
|-----------------------------------------|-------------|
| Table Analyzed                          | HeLa        |
| Column B                                | Control (-) |
| vs                                      | vs          |
| Column C                                | 1 mg/mL     |
| Unpaired t test                         |             |
| P value                                 | 0.3855      |
| P value summary                         | ns          |
| Are means signif. different? (P < 0.05) | No          |
| One- or two-tailed P value?             | Two-tailed  |
| t, df                                   | t=0.97 df=4 |
| Table Analyzed                          | HeLa        |
| Column B                                | Control (-) |
| vs                                      | vs          |
| Column D                                | 2 mg/mL     |
| Unpaired t test                         |             |
| P value                                 | 0.0034      |
| P value summary                         | **          |
| Are means signif. different? (P < 0.05) | Yes         |
| One- or two-tailed P value?             | Two-tailed  |
| t, df                                   | t=6.2 df=4  |
| Table Analyzed                          | HeLa        |
| Column B                                | Control (-) |
| vs                                      | vs          |
| Column E                                | 4 mg/mL     |

|                                         |             |
|-----------------------------------------|-------------|
| Unpaired t test                         |             |
| P value                                 | 0.0727      |
| P value summary                         | ns          |
| Are means signif. different? (P < 0.05) | No          |
| One- or two-tailed P value?             | Two-tailed  |
| t, df                                   | t=2.4 df=4  |
| Table Analyzed                          | HeLa        |
| Column B                                | Control (-) |
| vs                                      | vs          |
| Column F                                | 8 mg/mL     |

|                                         |            |
|-----------------------------------------|------------|
| Unpaired t test                         |            |
| P value                                 | 0.0014     |
| P value summary                         | **         |
| Are means signif. different? (P < 0.05) | Yes        |
| One- or two-tailed P value?             | Two-tailed |
| t, df                                   | t=7.9 df=4 |

---
